# Supplementary material for: Influenza Virus-Induced Robust Expression of SOCS3 Contributes to Excessive Production of IL-6
Source: PubMed Central journal article supplement (PMC6706793; doi:10.3389/fimmu.2019.01843), 2019-08-16
Supplement: Data_Sheet_1.pdf [file Data_Sheet_1.pdf]

## SUPPLEMENTAL MATERIAL

### TABLES

**Table 1. Sequences of primers used in this study.**

| Name                           | Sequence (5'-3')         |
|--------------------------------|--------------------------|
| SOCS3 (human) forward          | GACGGAGACTTCGATTCGGG     |
| SOCS3 (human) reverse          | GCTGGTACTCGCTCTTGGAG     |
| IFN $\beta$ (human) forward    | GCTCTCCTGTTGTGCTTCTCCAC  |
| IFN $\beta$ (human) reverse    | CAATAGTCTCATTCCAGCCAGTGC |
| IL-6 (human) forward           | AATGAGGAGACTTGCCTGGTG    |
| IL-6 (human) reverse           | TGAGGTGCCCATGCTACATT     |
| IL-28 (human) forward          | AGCTGCAGGCCTTTAAGAGG     |
| IL-28 (human) reverse          | TCCAGAACCTTCAGCGTCAG     |
| IL-6R $\alpha$ (human) forward | TCACTGTGTCATCCACGACG     |
| IL-6R $\alpha$ (human) reverse | CTGGATTCTGTCCAAGGCGT     |
| gp130 (human) forward          | CAGTGGTCACCTCACACTCC     |
| gp130 (human) reverse          | GTAGATCTTCTGGCCGCTCC     |
| IL-1 $\beta$ (human) forward   | CAGAAGTACCTGAGCTCGCC     |
| IL-1 $\beta$ (human) reverse   | TCGTGCACATAAGCCTCGTT     |
| TNF $\alpha$ (human) forward   | ACCCATGTACTCCTCACCCA     |

---

|                              |                           |
|------------------------------|---------------------------|
| TNF $\alpha$ (human) reverse | CTCACAGGGCAATGATCCCA      |
| wTG forward                  | AAATCCTGGTTGCTGTCTCTTTATG |
| wTG reverse                  | GGAAGGTCCGCTGGATTGA       |
| GFP forward                  | CGTCCAGGAGCGCACCATCTTCTT  |
| GFP reverse                  | ATCGCGCTTCTCGTTGGGGTCTTT  |
| NP (CA04) forward            | GTGGTCAGCCTGATGAGACC      |
| NP (CA04) reverse            | TCCGTCCTTCATTGTTCCCG      |
| NP forward                   | TCAAACGTGGGATCAATG        |
| NP reverse                   | GTGCAGACCGTGCTAGAA        |
| SOCS3 (mouse) forward        | GGAGATTTGCTTCGGGACT       |
| SOCS3 (mouse) reverse        | TCGCTTTTGGAGCTGAAGGT      |
| IL-6 (mouse) forward         | GGGACTGATGCTGGTGACAA      |
| IL-6 (mouse) reverse         | CGCACTAGGTTTGCCGAGTA      |
| ACTIN (mouse) forward        | GCTGCCTCAACACCTCAACCC     |
| ACTIN (mouse) reverse        | GTCCTCACCTCCCAAAG         |
| IL-1 $\beta$ (mouse) forward | GTGGCAGCTACCTGTGTCTT      |
| IL-1 $\beta$ (mouse) reverse | GGAGCCTGTAGTGCAGTTGT      |
| TNF $\alpha$ (mouse) forward | ACCCTCACACTCACAAACCA      |
| TNF $\alpha$ (mouse) reverse | ACCCTGAGCCATAATCCCCT      |

---

**Fig. S1**

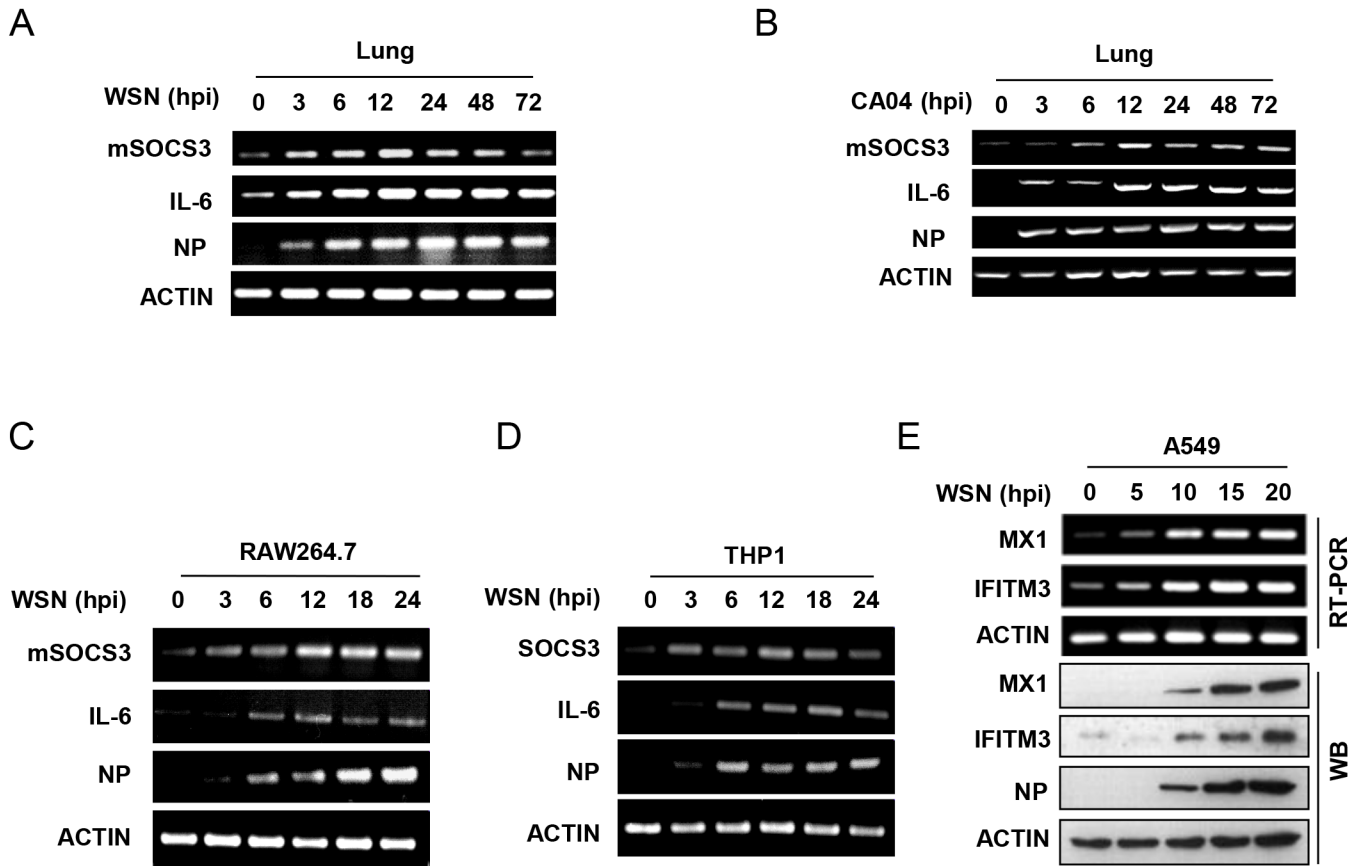

**Fig. S1 IAV infection induces robust expression of SOCS3 and IL-6 *in vitro* and *in vivo*.** (A, B) C57BL/6 mice were intranasally infected with WSN (A), CA04 (B) ( $5 \times 10^4$  PFU) and were sacrificed at the indicated times. The mSOCS3 and IL-6 mRNA levels in lungs were determined via RT-PCR. Shown are representative blots from three independent experiments (C, D) RAW264.7 (C) or THP1 (D) cells were infected with WSN for the indicated time. The mRNA levels of SOCS3, IL-6, gp130, IL-6R $\alpha$  were measured by RT-PCR. Shown are representative data from three independent experiments. (E) A549 cells were infected with WSN for the indicated times, the expression of MX1 and IFITM3 were examined by RT-PCR or Western blotting. Shown are representative data from three independent experiments.

**Fig. S2**

**A**

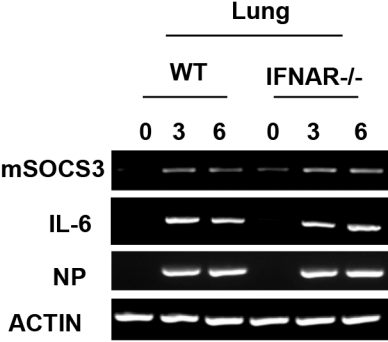

**B**

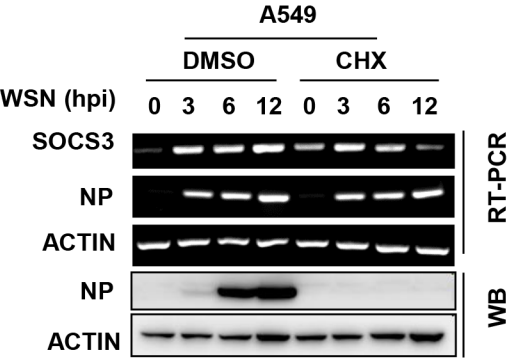

**C**

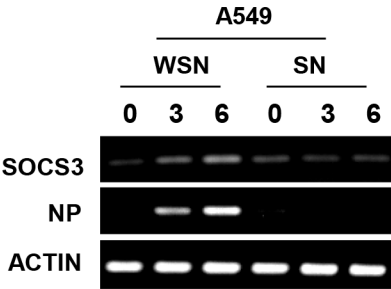

**Fig. S2 Expression of SOCS3 at early stage of IAV infection is independent of induction of cytokines including IL-6.** (A) Shown are mRNA levels of mSOCS3 and IL-6 determined via RT-PCR in lung tissues from IFNAR<sup>-/-</sup> mice and WT littermates after WSN infection for the indicated time. Shown are representative data from three independent experiments. (B) A549 cells were treated with DMSO (0.1 %) or CHX (1 ng/ml) for 30 min, and then infected with WSN (MOI = 1) for indicated time. The expression of SOCS3 was determined by RT-PCR. (C) A549 cells were infected by WSN for indicated time. Supernatants (SN) derived from these cell cultures were used to stimulate the native A549 for 1 h. Both infected cells and SN-stimulated cells were used to analyze SOCS3 expression via RT-PCR. Shown are representative blots from three independent experiments.

**Fig. S3**

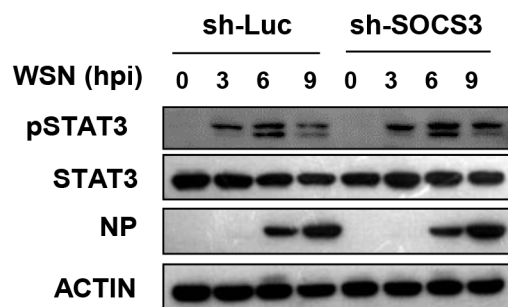

**Fig. S3 IAV impairs IL-6-stimulated STAT3 activation by upregulation of SOCS3.** A549 cells expressing sh-SOCS3 RNA or control sh-Luc were infected without or with WSN virus for the indicated time. The phosphorylation of STAT3 were examined by Western blotting. Shown are representative data from three independent experiments.



**Fig. S4**

**A**

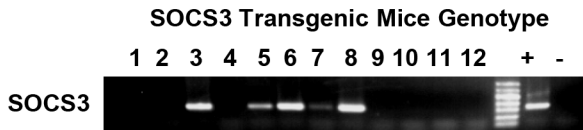

**B**

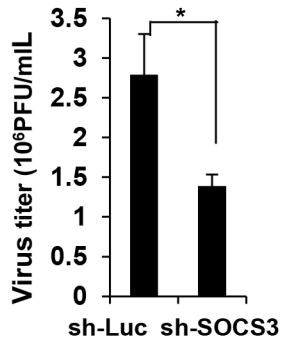

**D**

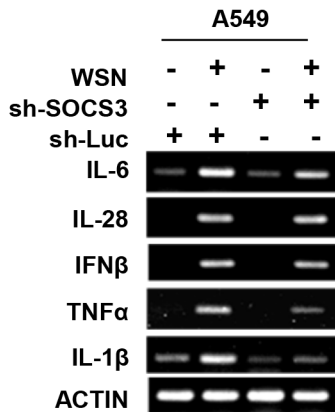

**E**

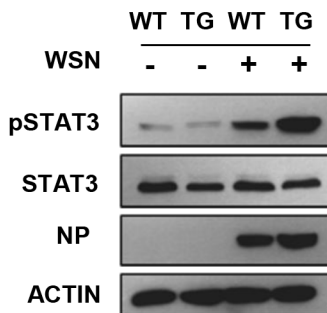

**C**

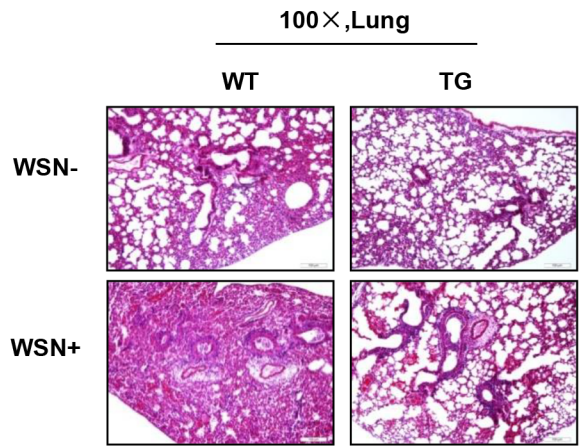

**F**

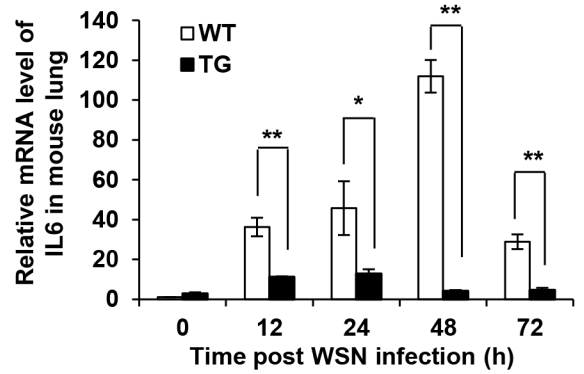

**G**

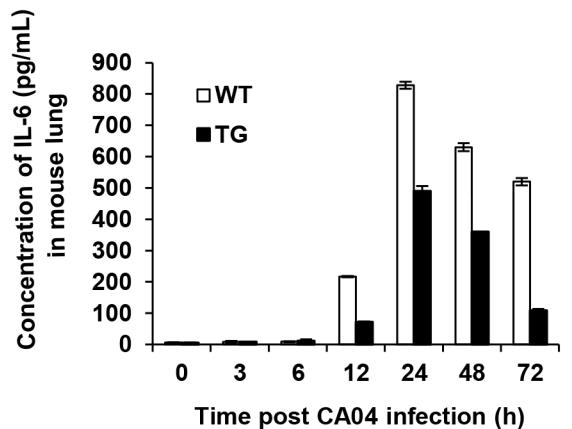

**Fig. S4 Targeted disruption of SOCS3 expression decreases viral replication during IAV infection *in vitro* and *in vivo*.** (A) The SOCS3-knockdown transgenic mice were genotyped via PCR. Shown is representative genotyping results of SOCS3-knockdown transgenic mice. Numbers 1-12, individual mice; +, positive control; -, negative control. (B) A549 cells stably expressing the shRNAs targeting SOCS3 or luciferase were infected with WSN (MOI=0.3). The viral titers in cell culture supernatants were determined by plaque forming assay (16 hpi). Data are shown as mean  $\pm$  S.D.; n=3; \*, P < 0.05 (Student's T test). (C) WT mice and SOCS3-knockdown TG mice were infected with WSN for 3 days. Shown are representative photomicrographs of the mouse lungs stained with hematoxylin and eosin (HE). The pathological changes of lungs in WT mice were more serious than that of the TG counterparts. Bars, 100  $\mu$ m. (D) SOCS3-knockdown or control A549 cells were infected with or without WSN (MOI = 0.3) for 15 h and the mRNA levels of IL-6, IL-1 $\beta$ , TNF $\alpha$ , IFN $\beta$ , IL-28A/B and were examined by RT-PCR. (E-G) TG mice and WT mice were intranasally infected with WSN (E, F) or CA04 (G) for 24 h (E) or indicated time points (F, G). The levels of phosphorylated STAT3 in mouse lungs were determined by Western blotting (E) and the mRNA or protein levels of IL-6 were examined by quantitative RT-PCR (RT-qPCR) (F) or ELISA (G), respectively. Shown are representative data from three independent experiments. Data are shown as mean  $\pm$  S.D.; \*, P < 0.05; \*\*, P < 0.01 (Student's T test).

Fig. S5

A

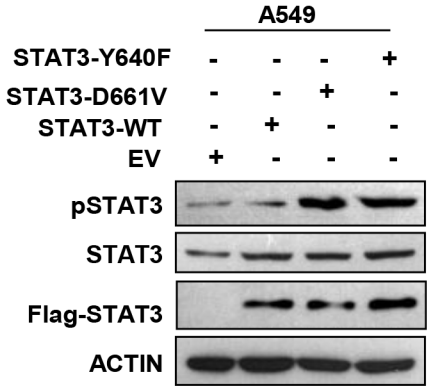

B

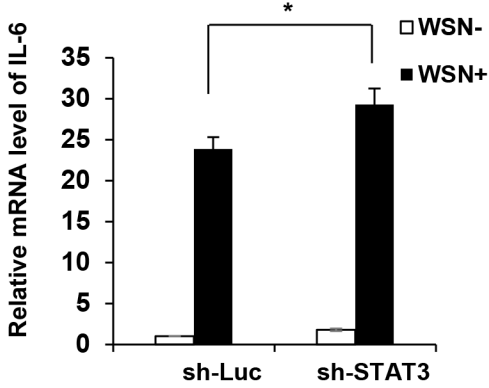

**Fig. S5 Altering STAT3 activity has significant effect on IL-6 expression.** (A) The pSTAT3 levels in A549 cells stably expressing STAT3-D661V, STAT3-Y640F, STAT3-WT or control (empty vector, EV) were detected by Western blotting. Shown are representative data from three independent experiments. (B) A549 cells expressing shRNAs targeting STAT3 or luciferase (Luc) were infected with or without WSN, the IL-6 mRNA levels were examined via RT-qPCR. Shown are representative blots from three independent experiments. Data are shown as mean  $\pm$  S.D.; \*,  $P < 0.05$ ;
